# Supplementary material
Source: PubMed Central journal article supplement (PMC2563086)
Supplement: 0802699105_0802699105SI.pdf [file 0802699105_0802699105SI.pdf]

# Supporting Information

Islam et al. 10.1073/pnas.0802699105

|                | 1                           | 10      | 20        | 30                | 40       | 50                | 58       |                |
|----------------|-----------------------------|---------|-----------|-------------------|----------|-------------------|----------|----------------|
| Wild-type:     | RPDFCLEPP                   | YTGPK   | ARIIRYFYN | AKAGLCQ           | TFVYGGCR | AKRNNFKS          | AEDCMRTC | CGGA           |
| BPTI-[5,55]:   | RPDFCLEPP                   | YTGPAK  | ARIIRYFYN | AKAGLAQ           | TFVYGGAR | AKRNNFKS          | AEDALRTC | CGGA           |
| BPTI-[5,55]st: | RPDFCLEPP                   | YTGPK   | ARIIRYFYN | AKAGLAQ           | TFVYGGAR | AKRNNFKS          | AEDALRTC | CGGA           |
| BPTI-21:       | RP                          | AFCLEPP | YAGPK     | ARIIRYFYN         | AAAGAAQ  | AFVYGGAR          | AKRNNFAS | AADALAACAAA    |
| BPTI-20st:     | RP                          | AFCLEPP | YAGPK     | ARIIRYFYN         | AAAGAAQ  | AFVYGGAR          | AKRNNFAS | AADALAACAAA    |
|                | <u>3<sub>10</sub>-Helix</u> |         |           | <u>β-Strand 1</u> |          | <u>β-Strand 2</u> |          | <u>α-Helix</u> |

Fig. S1. Sequences of the wild-type BPTI, BPTI-[5,55], BPTI-[5,55]st, BPTI-21, and BPTI-20st. Alanines are shown in red. A14G was introduced to stabilize the BPTI-21 and BPTI-[5,55], and M52L for avoiding cleavage by cyanogen bromide during the purification protocol. BPTI-[5,55] is a single-disulfide-bonded variant with the remaining two S-S bonds substituted to alanines. Simplified BPTI-21 sequence contains a total of 14 alanine substitutions, of which 3 are buried and 2 are partially buried.

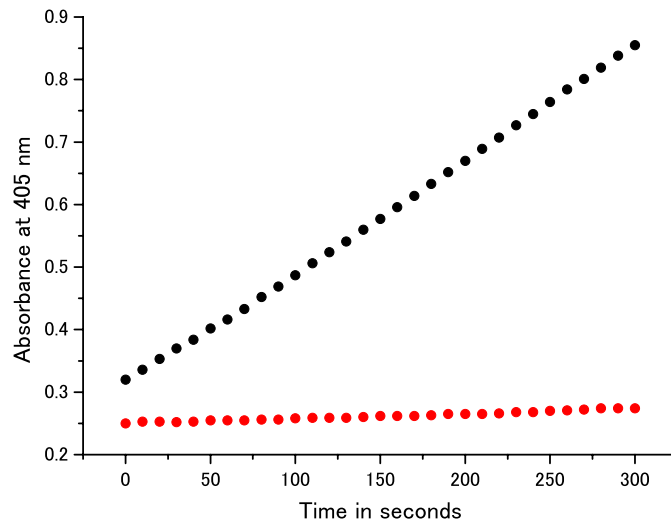

**Fig. S2.** Trypsin inhibition activity of BPTI variants. The trypsin inhibition activity of the BPTI variants was assayed by monitoring the hydrolysis of *N*<sup>α</sup>-benzoyl-DL-arginine *p*-nitroanilide (BAPA) in 0.2 M phosphate buffer (pH 7.0) at room temperature [Kassell, B (1970) *Method Enzymol* 19:844–852]. Black filled circles represent the activity of trypsin on *N*<sup>α</sup>-benzoyl-DL-arginine *p*-nitroanilide (BAPA) in absence of BPTI and filled red circles represent the activity of trypsin BAPA in presence of BPTI-20st at equimolar concentration (280 nM) measured at 405 nm over 5 min.

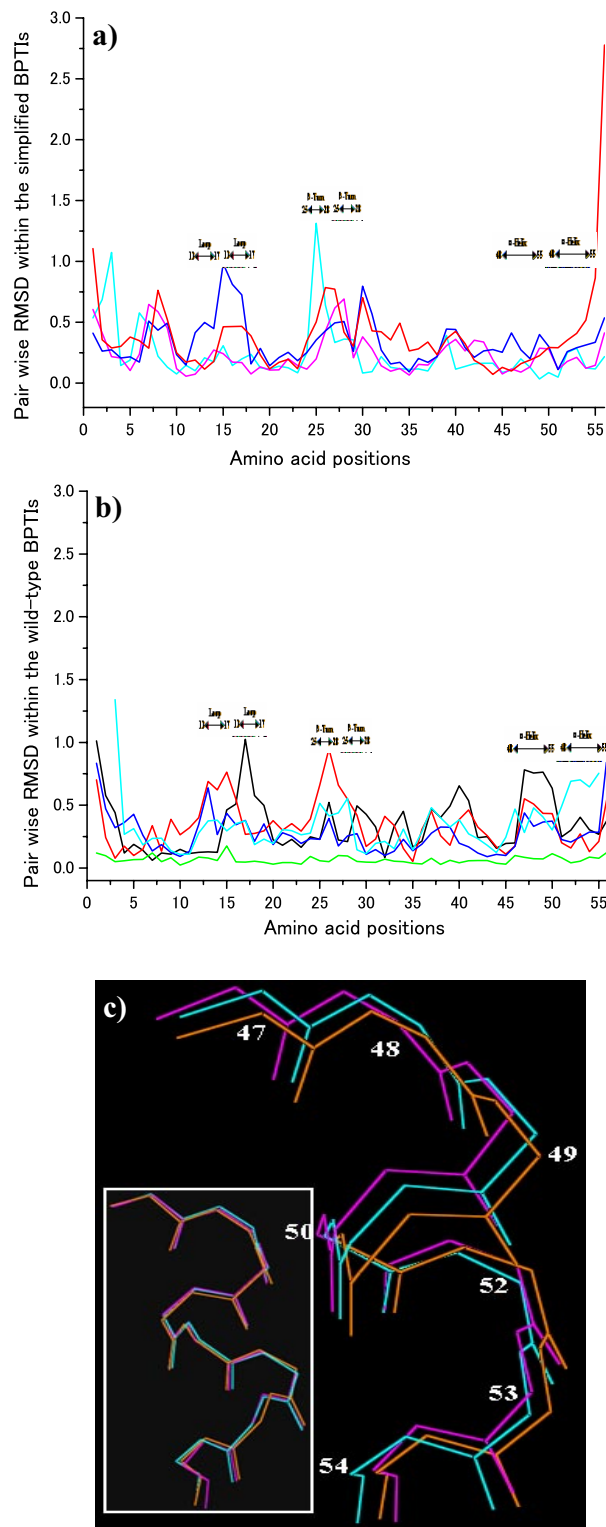

**Fig. 53.** Structural variations within the wild-type and simplified BPTIs. (a) Pairwise RMSD among the chains in the asymmetric units. Cyan line for chain 1/chain 2 of BPTI-[5,55]st, violet, blue, and red lines for chain 1/chain 2, chain 1/chain 3, and chain 1/chain 4, respectively of BPTI-20st. (b) Pairwise RMSD among the wild-type structures. Here, 5PTI is used as the reference wild-type structure. Black, red, green, blue, and cyan lines represent 4PTI, 6PTI, 9PTI, 1G6X, and 2FI3, respectively. (c) Superimposed structures of the 47~54  $\alpha$ -helix region. The backbone structures of the 47~54  $\alpha$ -helix region observed upon global superimposition of BPTI-20st and BPTI[5,55]st onto 5PTI (RMSD 0.45~1.29 Å). Local superimposed structures of the 47~54  $\alpha$ -helix region (RMSD 0.17 Å) are shown in *Inset*.

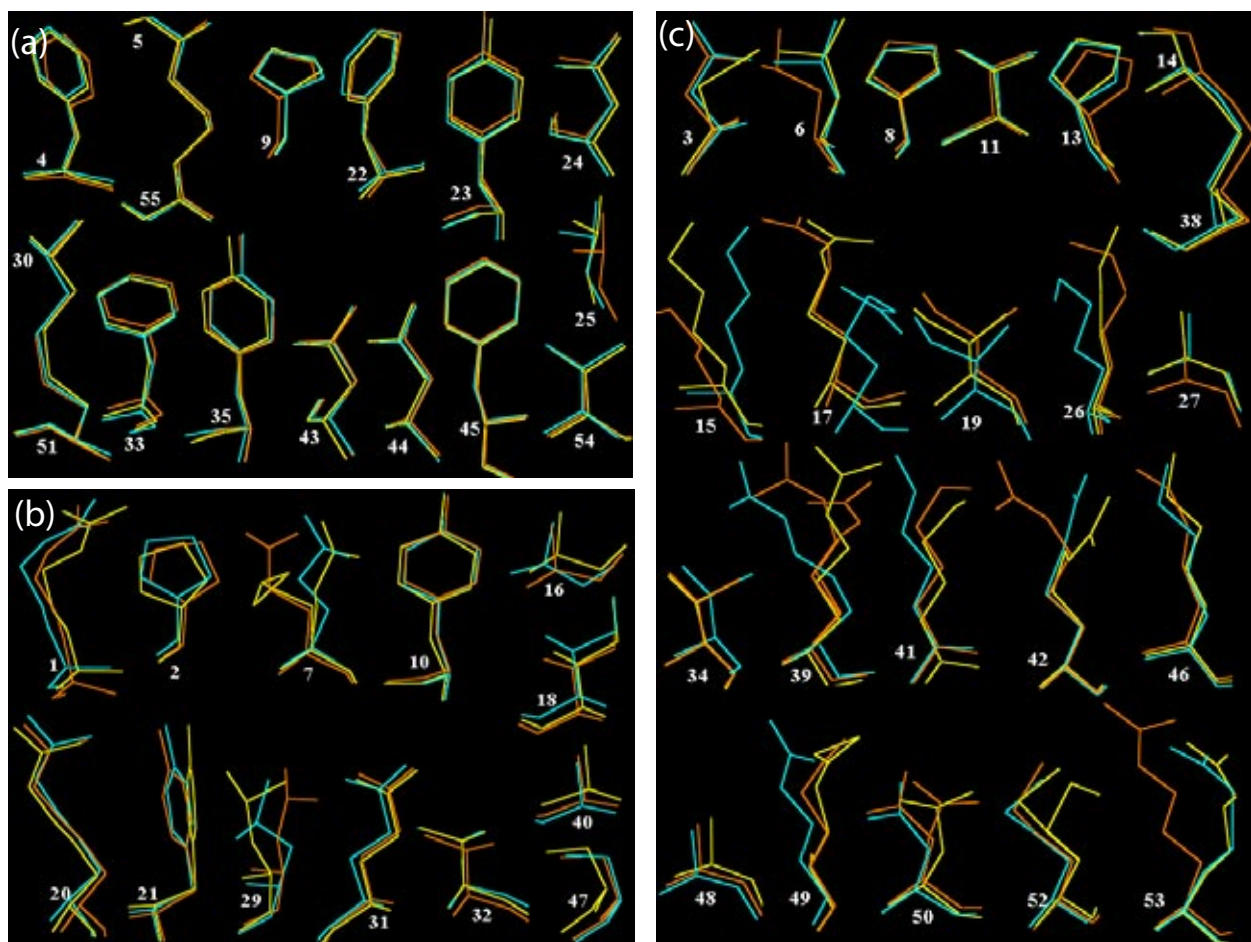

**Fig. S4.** Side-chain conformations in wild-type BPTI structures. Side-chain structures of residues buried (ASA 0~30%) (a), partially buried (ASA 30~50%) (b) and surface-exposed (ASA 50~70%) (c). Yellow, cyan, and orange, respectively, for 5PTI, 4PTI, and 6PTI. Figures were generated by using PyMOL graphics ([www.pymol.org](http://www.pymol.org)).

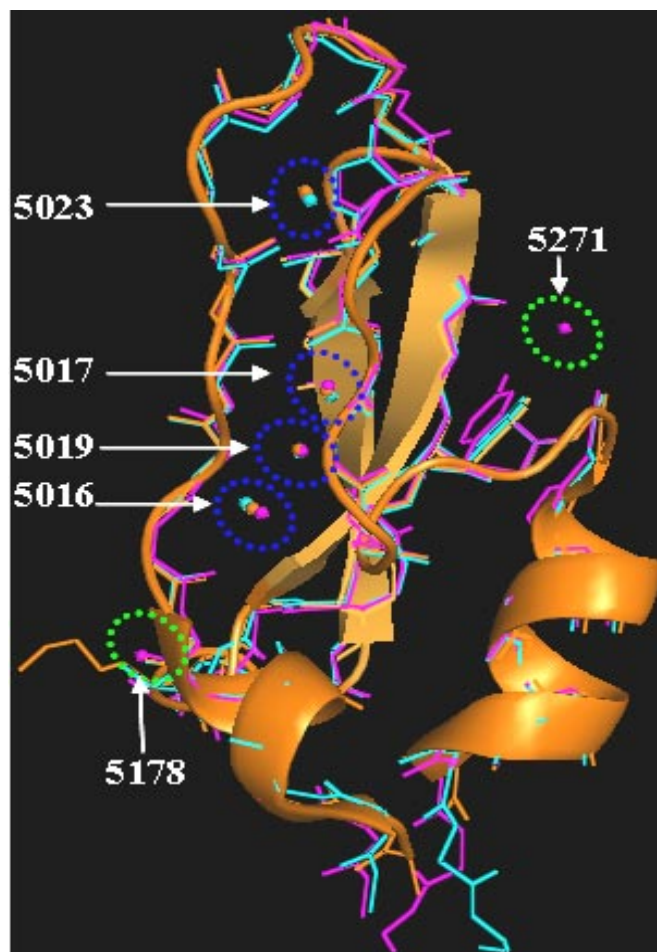

**Fig. S5.** Conserved structural water molecules. Four completely buried water molecules conserved in several wild-type BPTI structures (marked by blue circles) are also conserved in simplified BPTI structures. In addition, two new waters are observed only in BPTI-20st structures (green circle); one is close to the 25~28  $\beta$ -turn region and the other is hydrogen-bonded to the side-chain atom of Tyr-21, which is assigned in a slightly shifted configuration in BPTI-20st. Identities of water molecules are taken from BPTI-20st. Orange, cyan, and pink represent, respectively, wild type, BPTI-[5,55]st, and BPTI-20st. The figure was generated with PyMOL ([www.pymol.org](http://www.pymol.org)).

**Table S1. Structural variations among wild-type, reference, and simplified BPTIs**

| RMSD, Å        | Structure pair |           |           |             |                |                 |
|----------------|----------------|-----------|-----------|-------------|----------------|-----------------|
|                | 4PTI/5PTI      | 4PTI/6PTI | 4PTI/9PTI | 5PTI/-20 st | 5PTI/-[5,55]st | -20st/-[5,55]st |
| C <sup>α</sup> | 0.398          | 0.417     | 0.403     | 0.565       | 0.469          | 0.552           |
| BB             | 0.402          | 0.436     | 0.417     | 0.551       | 0.480          | 0.534           |
| All            | 1.104          | 1.155     | 1.068     | 0.810       | 0.967          | 1.05            |

4PTI (1), 5PTI (2), 6PTI (3), and 9PTI (4) are the PDB ID codes of wild-type BPTI structures.

1. Bolognesi M, *et al.* (1982) Three-dimensional structure of the complex between pancreatic secretory trypsin inhibitor (Kazal type) and trypsinogen at 1.8 Å resolution. Structure solution, crystallographic refinement and preliminary structural interpretation. *J Mol Biol* 162:839–868.
2. Wlodawer A, Nachman J, Gilliland GL, Gallagher W, Woodward C (1987) Structure of form III crystals of bovine pancreatic trypsin inhibitor. *J Mol Biol* 198:469–480.
3. Wlodawer A, Walter J, Huber R, Sjolín L (1984) Structure of bovine pancreatic trypsin inhibitor. Results of joint neutron and x-ray refinement of crystal form II. *J Mol Biol* 180:301–329.
4. Eigenbrot C, Randal M, Kossiakoff AA (1990) Structural effects induced by removal of a disulfide-bridge: The x-ray structure of the C30A/C51A mutant of basic pancreatic trypsin inhibitor at 1.6 Å. *Protein Eng* 3:591–598.

**Table S2. Conserved structural waters in wild-type, reference, and simplified BPTIs**

| Waters*           | ASA, % | BPTI-20st | BPTI-[5,55]st | 5PTI | Ligands distances, Å                                            |
|-------------------|--------|-----------|---------------|------|-----------------------------------------------------------------|
| 5016              | 0      | Y         | Y             | Y    | Trp10-N (2.95 ± 0.04) Asn43-N (2.74 ± 0.8) Lys41-O (4.25 ± 0.2) |
| 5017              | 0      | Y         | Y             | Y    | Trp10-O (2.8 ± 0.04) Lys41-N (2.92 ± 0.06) 3004-O (2.71 ± 0.07) |
| 5019              | 0      | Y         | Y             | Y    | Pro8-O (2.81 ± 0.07) 3004-O (2.66 ± 0.08) Asn43-N (3.96 ± 0.3)  |
| 5023              | 0      | Y         | Y             | Y    | Ala11-O (2.78 ± 0.03) Val/Cys38-O (2.73 ± 0.05)                 |
| 5043              | 1.2    | Y         | Y             | Y    | Cys5-O (2.87 ± 0.2) Leu6-O (3.54 ± 0.2) Tyr23-OH (2.88 ± 0.09)  |
| 5089              | 24     | Y         | Y             | Y    | Ile19-N (2.89 ± 0.05) Arg17-O (3.96 ± 0.16)                     |
| 5121              | 12     | Y         | Y             | Y    | Gly14-O (2.76 ± 0.1) Gly12-O (2.68 ± 0.2) Gly36-N (3.76 ± 0.8)  |
| 5133              | 20.9   | Y         | Y             | Y    | Asp50-OD2 (2.7 ± 0.1) Ala/Lys46-N (2.83 ± 0.08)                 |
| 5199              | 43     | Y         | Y             | Y    | Ala/Thr54-O (2.75 ± 0.3) Ala/Arg53-O (3.87 ± 0.3)               |
| 5271 <sup>†</sup> | 9.7    | Y         | N             | N    | Tyr21-OH (2.69) Ile19-O (4.81)                                  |
| 5178 <sup>†</sup> | 2.7    | Y         | N             | N    | Asn24-OD1 (3.21) Asn-24N (3.20) Ala26-N (2.96)                  |

\*Identities and ASA of water molecules are as in BPTI-20st structure.

<sup>†</sup>Waters observed only in BPTI-20st.

**Table S3. Intra-atomic distances (Å) in the wild-type, reference, and simplified BPTIs**

| Atom pair                                   | 4PTI | BPTI-[5,55]st | BPTI-20st |
|---------------------------------------------|------|---------------|-----------|
| C <sup>α</sup> _C/G14-C <sup>α</sup> _C/A38 | 5.69 | 5.28          | 4.93      |
| C <sup>α</sup> _C/A30-C <sup>α</sup> _C/A51 | 6.40 | 5.97          | 5.95      |
| C <sup>α</sup> _C5-C <sup>α</sup> _C55      | 5.73 | 5.43          | 5.72      |
| OH.Y21-CG2.T/A32                            | 3.79 | 3.86          |           |
| OH.Y21-CB.T/A32                             | 5.21 | 5.38          | 4.62      |
| CZ.F4-CG2.T/A54                             | 3.75 | 3.80          |           |
| CZ.F4-CB.T/A54                              | 5.24 | 5.23          | 4.35      |
| CZ.F45-CB.T/A54                             | 3.97 | 3.57          | 3.74      |
